# Supplementary material for: Hypercholesterolemia Is Associated with the Apolipoprotein C-III (APOC3) Genotype in Children Receiving HAART: An Eight-Year Retrospective Study
Source: PLOS journal article supplement (doi:10.1371/journal.pone.0039678), 2012-07-25
Supplement: S4 (10.1371/journal.pone.0039678.s004) [file journal.pone.0039678.s004]

**Supplementary Table S1. Measured variables and functional form for analysis.**

| Measured Variable                               | Starting model for fractional polynomial algorithm             | Variable type            | Hierarchical model term <sup>1</sup> |
|-------------------------------------------------|----------------------------------------------------------------|--------------------------|--------------------------------------|
| Cross-sectional variables (patient invariant)   |                                                                |                          |                                      |
| Date of birth                                   | Age at HAART initiation (months)                               | Continuous               | Null                                 |
| Sex                                             | Sex                                                            | Binary                   | Null                                 |
| Date of AIDS onset                              | AIDS before first lipid determination                          | Binary                   | Null                                 |
| Use of ARV drugs before HAART start             | Naive status                                                   | Binary                   | Null                                 |
| APOC3 Haplotype                                 | IRE -482 CC/TC/TT                                              | Categorical <sup>2</sup> | Alternative 1                        |
|                                                 | IRE -455 TT/TC/CC                                              | Categorical <sup>2</sup> | Alternative 1                        |
|                                                 | 3'UTR 3238 CC/CG/GG                                            | Categorical <sup>2</sup> | Alternative 1                        |
| Longitudinal variables (time variant)           |                                                                |                          |                                      |
| Time to first HAART scheme initiation           | Time on HAART before current scheme (months)                   | Continuous               | Null                                 |
| Time on current scheme                          | Time on current scheme                                         | Continuous               | Null                                 |
| Current scheme drugs                            | Use of RTV (full-dose)                                         | Binary                   | Null                                 |
|                                                 | Use of RTV-boosted PI treatment                                | Binary                   | Null                                 |
|                                                 | Use of NFV                                                     | Binary                   | Null                                 |
|                                                 | Use of any NNRTI                                               | Binary                   | Null                                 |
|                                                 | Use of D4T                                                     | Binary                   | Null                                 |
| Plasma lipids levels                            | Triglycerides (mg/dl)                                          | Continuous               | Response                             |
|                                                 | Total Cholesterol (mg/dl)                                      | Continuous               | Response                             |
|                                                 | LDL-C (mg/dl)                                                  | Continuous               | Response                             |
|                                                 | HDL-C (mg/dl)                                                  | Continuous               | Response                             |
| Viral load close to lipids determination        | Viral load                                                     | Continuous               | Null                                 |
| CD4+ T cell count close to lipids determination | CD4+ T cell count (%)                                          | Continuous               | Null                                 |
| Weight/height close to lipids determination     | BMI Z-score                                                    | -                        | -                                    |
| Date of menarche                                | Before/after menarche                                          | Binary                   | Null                                 |
| Interactions                                    |                                                                |                          |                                      |
|                                                 | Time on Current scheme drugs                                   | Continuous               | Null                                 |
|                                                 | APOC3 genotype and current scheme drugs (only for D4T and RTV) | Categorical              | Alternative 2                        |
|                                                 | Time on current scheme and APOC3 genotype                      | Continuous               | Alternative 3                        |
|                                                 | Time on HAART before current scheme and APOC3 genotype         | Continuous               | Alternative 3                        |

List of all variables as they were measured, and as included in LMM/GLMM.

<sup>1</sup> least general model where variable is included (Supplementary Figure S1)

<sup>2</sup> two contrasts versus wildtype (most frequent allele)
